# Supplementary material for: Urinary and breast milk biomarkers to assess exposure to naphthalene in pregnant women: an investigation of personal and indoor air sources
Source: PubMed Central journal article supplement (PMC4021493; doi:10.1186/1476-069x-13-30), 2014-04-27

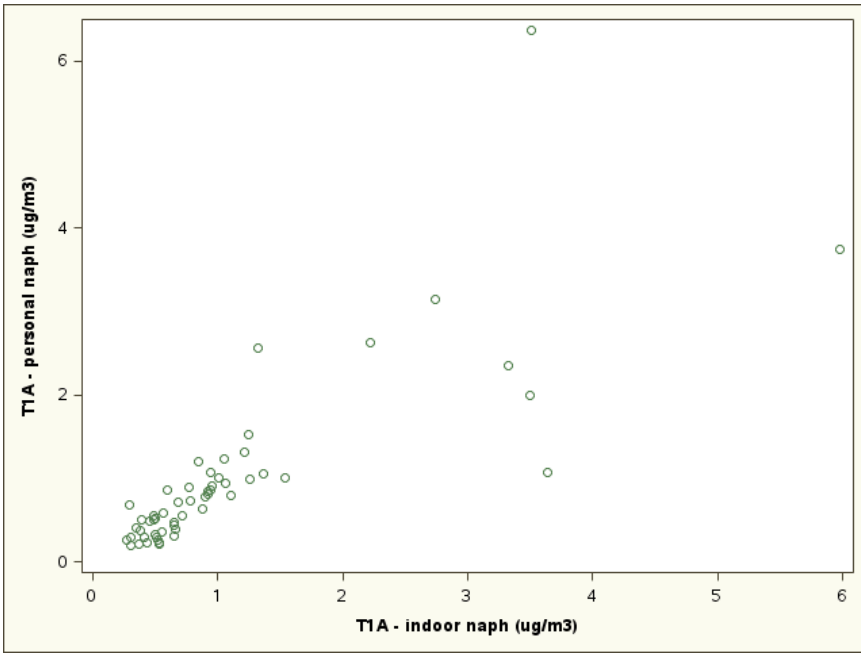

Supplement: 1476-069X-13-30-S2.pdf [file 1476-069X-13-30-S2.pdf]
